# Supplementary material for: Investigating the Role of Environmental Factors on the Survival, Stability, and Transmission of SARS-CoV-2, and Their Contribution to COVID-19 Outbreak: A Review
Source: MDPI journal article supplement (doi:10.3390/su141811135), 2022-09-06
Supplement: s1 [file s1]

## Supplementary material

Search strategy:

Investigating the role of environmental factors on the survival, stability, and transmission of sars-cov-2, and their contribution to covid-19 outbreak: a review.

| Search strategy (PubMed) |                                                                                                                                                                                                                                                                                                                                                                                                                                                                                                                                                                                                                                                                                                                            | Results                   |
|--------------------------|----------------------------------------------------------------------------------------------------------------------------------------------------------------------------------------------------------------------------------------------------------------------------------------------------------------------------------------------------------------------------------------------------------------------------------------------------------------------------------------------------------------------------------------------------------------------------------------------------------------------------------------------------------------------------------------------------------------------------|---------------------------|
| Search1                  | (SARS-CoV-2 [MeSH Terms] OR COVID-19 [MeSH Terms] OR Coronavirus Infections [MeSH Terms] OR Coronavirus [MeSH Terms])<br>Filters: Free full text, Clinical Trial, Randomized Controlled Trial, Review, Systematic Review, from 2019 - 2022                                                                                                                                                                                                                                                                                                                                                                                                                                                                                 | 21,117                    |
| Search2                  | environment [MeSH Terms]) OR Environmental factor* [Title/Abstract])<br>OR climatic factor* [Title/Abstract]) OR temperature [MeSH Terms])<br>OR humidity [MeSH Terms] OR air pollution [MeSH Terms] OR transportation [MeSH Terms] OR municipal waste management [Title/Abstract] OR underlying diseases [Title/Abstract]<br>Filters: Free full text, Clinical Trial, Randomized Controlled Trial, Review, Systematic Review, from 2019 - 2022                                                                                                                                                                                                                                                                            | 15,283                    |
| Search3                  | (Stability [Title/Abstract]) OR Hospitalization [MeSH Terms] OR health [MeSH Terms] OR Economics [MeSH Terms]<br>Filters: Free full text, Clinical Trial, Randomized Controlled Trial, Review, Systematic Review, from 2019 - 2022                                                                                                                                                                                                                                                                                                                                                                                                                                                                                         | 22,058                    |
| Search4                  | #1 AND #2 AND #3<br><br>(SARS-CoV-2 [MeSH Terms] OR COVID-19 [MeSH Terms] OR Coronavirus Infections [MeSH Terms] OR Coronavirus [MeSH Terms]) AND (environment [MeSH Terms]) OR Environmental factor* [Title/Abstract]) OR climatic factor* [Title/Abstract]) OR temperature [MeSH Terms]) OR humidity [MeSH Terms] OR air pollution [MeSH Terms] OR transportation [MeSH Terms] OR municipal waste management [Title/Abstract] OR underlying diseases [Title/Abstract]) AND ((Stability [Title/Abstract]) OR Hospitalization [MeSH Terms] OR health [MeSH Terms] OR Economics [MeSH Terms])<br>Filters: Free full text, Clinical Trial, Observational Study, Review, Systematic Review, Humans, English, from 2019 - 2022 | Total search: 446 results |

| <b>ProQuest</b>                                                                                                                                                                                                                                                                                                                                                                                                                             |      |
|---------------------------------------------------------------------------------------------------------------------------------------------------------------------------------------------------------------------------------------------------------------------------------------------------------------------------------------------------------------------------------------------------------------------------------------------|------|
| (AB(SARS-CoV-2) OR AB(COVID-19) OR AB(Coronavirus Infections) OR AB(Coronavirus)) AND (AB(environment) OR AB(Environmental factor) OR AB(climatic factor) OR AB(humidity) OR AB(temperature) OR AB(air pollution) OR AB(transportation) OR AB(municipal waste management) OR AB(underlying diseases)) AND (AB(Stability) OR AB(Hospitalization) OR AB(health) OR AB(Economics))<br>Additional limits: Fulltext/English/Article/ last 3 year | 2776 |

| <b>Web of science</b>                                                                                                                                                                                                                                                                                                                        |     |
|----------------------------------------------------------------------------------------------------------------------------------------------------------------------------------------------------------------------------------------------------------------------------------------------------------------------------------------------|-----|
| ((TI=(( SARS-CoV-2 OR COVID-19 OR Coronavirus Infections OR Coronavirus) AND (environment OR Environmental factor OR climatic factor OR temperature OR humidity OR air pollution OR transportation OR municipal waste management OR underlying diseases) AND (Stability OR Hospitalization OR health OR Economics))))<br>Filter: 2019 to now | 159 |

| <b>Science Direct</b>                                                                                                                                                                            |       |
|--------------------------------------------------------------------------------------------------------------------------------------------------------------------------------------------------|-------|
| (SARS-CoV-2 OR COVID-19 OR Coronavirus) AND (environment OR Environmental factor) AND (Stability OR Hospitalization OR health OR Economics)<br>Filter: 2019 to now/ Research and review articles | 1,261 |

### **Extracted papers**

Studies identified through international database search = 4642

Duplicate finding = 1753

Studies remained after removal of the duplicates =2889
